# Supplementary material
Source: PubMed Central journal article supplement (PMC5029216)
Supplement: ismej2015187x10.pdf [file ismej2015187x10.pdf]

|           | GF_col1 | GF_col1 | GF_col1 | GF_stool1 | GF_stool1 | GF_stool1 | GF_stool2 | GF_stool2 |
|-----------|---------|---------|---------|-----------|-----------|-----------|-----------|-----------|
| GF_col1   | 1       | 0.535   | 0.450   | 0.409     | 0.483     | 0.490     | 0.411     | 0.495     |
| GF_col1   | 0.535   | 1       | 0.741   | 0.675     | 0.670     | 0.639     | 0.577     | 0.576     |
| GF_col1   | 0.450   | 0.741   | 1       | 0.655     | 0.599     | 0.597     | 0.592     | 0.556     |
| GF_stool1 | 0.409   | 0.675   | 0.655   | 1         | 0.774     | 0.693     | 0.613     | 0.598     |
| GF_stool1 | 0.483   | 0.670   | 0.599   | 0.774     | 1         | 0.740     | 0.589     | 0.618     |
| GF_stool1 | 0.490   | 0.639   | 0.597   | 0.693     | 0.740     | 1         | 0.637     | 0.634     |
| GF_stool2 | 0.411   | 0.577   | 0.592   | 0.613     | 0.589     | 0.637     | 1         | 0.737     |
| GF_stool2 | 0.495   | 0.576   | 0.556   | 0.598     | 0.618     | 0.634     | 0.737     | 1         |

Table-S6 (Elias)
